# Supplementary material
Source: PubMed Central journal article supplement (PMC6615458)

# Supplemental Figure 1

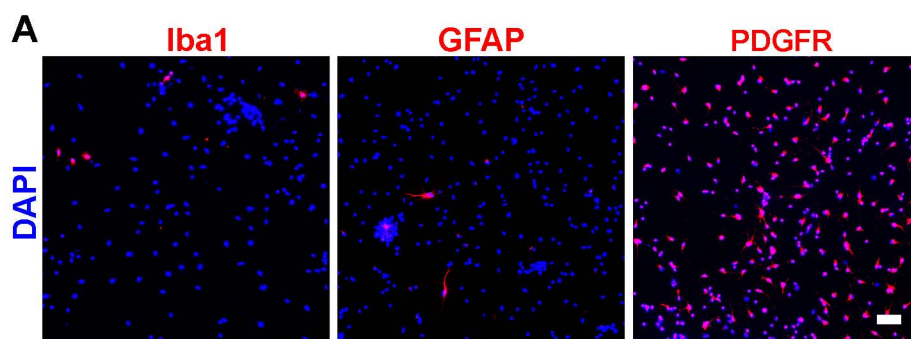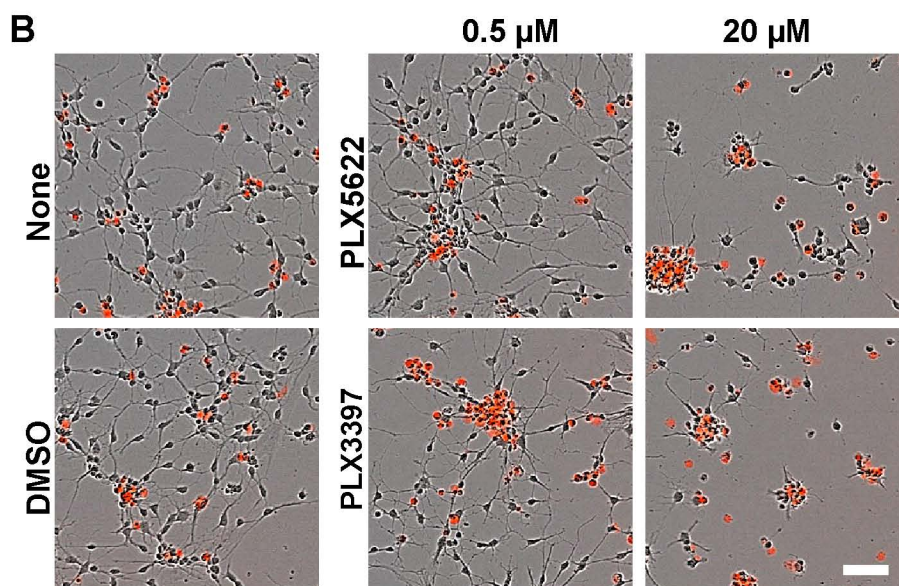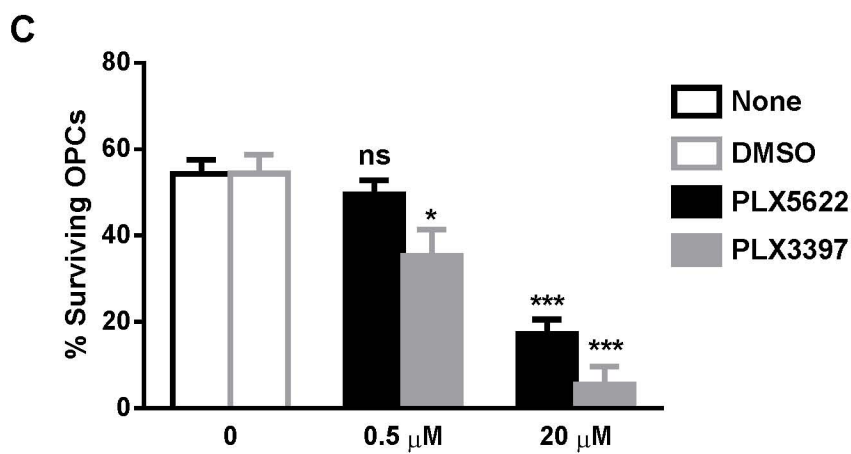

# Supplemental Figure 2

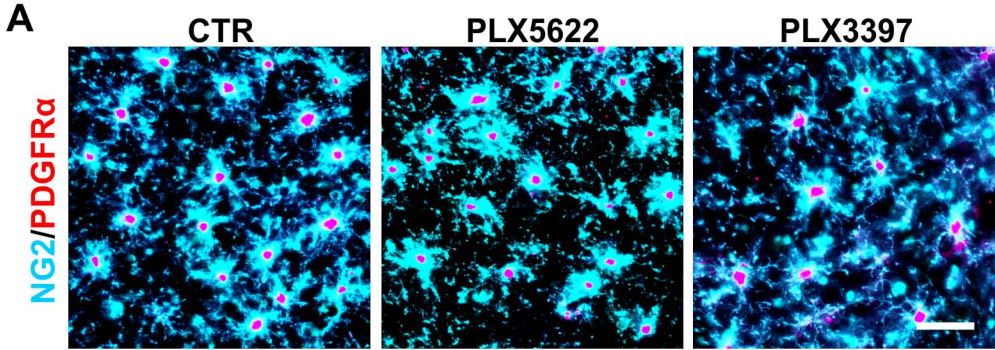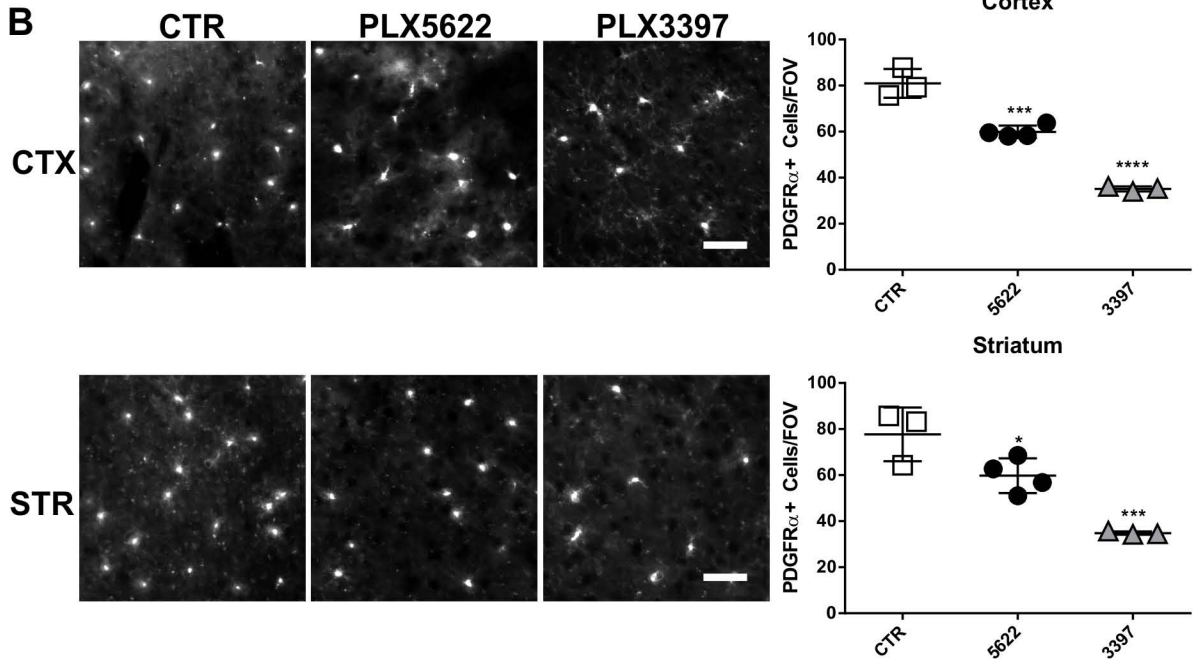

Supplement: NIHMS1528362-supplement-1.pdf [file NIHMS1528362-supplement-1.pdf]
